# Supplementary material for: Effects of COVID-19 Lockdown on Weight, Body Composition, and Behavior of Children, Adolescents, and Young Adults with Prader–Willi Syndrome
Source: MDPI journal article supplement (doi:10.3390/jcm10204746), 2021-10-16
Supplement: s1 [file s1]

## Children and Adolescents with PWS during the COVID-19 Pandemic

### Family situation since the Lockdown

(Please tick appropriate answer)

**Father:** Occupation \_\_\_\_\_

Occupational situation since the Lockdown

☐ unchanged      ☐ changed

- ☐ unchanged at work
- ☐ self-employed
- ☐ shiftwork
- ☐ working from home
- ☐ short-time work
- ☐ other

**Mother:** Occupation \_\_\_\_\_

Occupational situation since the Lockdown

☐ unchanged      ☐ changed

- ☐ unchanged at work
- ☐ self-employed
- ☐ shiftwork
- ☐ working from home
- ☐ short-time work
- ☐ other

**Siblings:**

Date of birth:

Educational level/occupation:

|  |  |  |
|--|--|--|
|  |  |  |
|  |  |  |
|  |  |  |
|  |  |  |
|  |  |  |

## Did your family receive support by other family members?

☐ No

☐ Yes

Whom : \_\_\_\_\_

**Hometown:**

Population: \_\_\_\_\_

## Childcare during the Lockdown

Childcare before COVID-19: ☐ At home ☐ Nursery ☐ School

Grade \_\_\_\_\_

Mainstem institution ☐ Institution with inclusion ☐

Other: \_\_\_\_\_

Break in childcare services: ☐ Yes ☐ No

☐ **Emergency childcare**; extend of emergency childcare:

\_\_\_\_\_

Duration; from: \_\_\_\_\_ to: \_\_\_\_\_

## Therapies

|                      | Before COVID-19 | Break from: | to: |
|----------------------|-----------------|-------------|-----|
| Physiotherapy        |                 |             |     |
| Occupational therapy |                 |             |     |
| Speech therapy       |                 |             |     |
| Early intervention   |                 |             |     |
| Therapeutic riding   |                 |             |     |
|                      |                 |             |     |
|                      |                 |             |     |

Support received from therapists,  
e.g., through video instructions, therapy plans, etc.

☐ No

☐ Yes

Which form of support was offered by the therapists:

---

---

---

---

---

### Family Life during the COVID-19 Lockdown

Change in routines

☐ No

☐ Yes

Set mealtimes

☐ No

☐ Yes

Breakfast time

\_\_\_\_\_ o'clock

Set activities

☐ No

☐ Yes

Which set activities:

---

---

---

### Medical situation

Has your child or another family member been infected with COVID-19?

☐ No

☐ Yes

Who: \_\_\_\_\_

Severity/course of infection:

---

### Has your child been sick since the last appointment?

☐ No ☐ Yes

Disease: \_\_\_\_\_

### Did your child have to take any new medications?

☐ No ☐ Yes

Which medications: \_\_\_\_\_

### How did your child with PWS deal with the new situation?

Behavioral problems (0 = no behavioral problems 9 = severe behavioral problems)

Before the Lockdown

|   |   |   |   |   |   |   |   |   |   |
|---|---|---|---|---|---|---|---|---|---|
| 0 | 1 | 2 | 3 | 4 | 5 | 6 | 7 | 8 | 9 |
|---|---|---|---|---|---|---|---|---|---|

During the Lockdown

|   |   |   |   |   |   |   |   |   |   |
|---|---|---|---|---|---|---|---|---|---|
| 0 | 1 | 2 | 3 | 4 | 5 | 6 | 7 | 8 | 9 |
|---|---|---|---|---|---|---|---|---|---|

After the Lockdown

|   |   |   |   |   |   |   |   |   |   |
|---|---|---|---|---|---|---|---|---|---|
| 0 | 1 | 2 | 3 | 4 | 5 | 6 | 7 | 8 | 9 |
|---|---|---|---|---|---|---|---|---|---|

### How would you rate your family situation during the Lockdown?

Unchanged compared to before the Lockdown ☐ No ☐ Yes

Strenuous ☐ No ☐ Yes

Very strenuous ☐ No ☐ Yes

Our family moved closer together ☐ No ☐ Yes

Our family enjoyed the lockdown ☐ No ☐ Yes

## Room for Comments

e.g., what did your family do differently during the Lockdown?

---

---

---

---

---

What kind of support would you wish to receive during a second lockdown?

---

---

---

---

---
